# Supplementary material
Source: publisher figshare collection journal article supplement (https://karger.figshare.com/articles/dataset/_/5126284)
Supplement: Supplementary file 1 [file 1]

**Supplementary Table 1. Key co-morbidity covariate risks across three different re-hospitalization primary outcomes**

| Elixhauser Comorbidity                       | — | <i>Emergency Department Re-Hospitalization</i> |             |                | <i>Any Re-Hospitalization</i> |             |                | <i>Re-Hospitalization Resulting in Death</i> |             |                |
|----------------------------------------------|---|------------------------------------------------|-------------|----------------|-------------------------------|-------------|----------------|----------------------------------------------|-------------|----------------|
|                                              |   | HR                                             | 95% CI      | <i>p</i> value | HR                            | 95% CI      | <i>p</i> value | HR                                           | 95% CI      | <i>p</i> value |
| Congestive Heart Failure                     |   | 1.28                                           | 1.26 – 1.30 | < 0.001        | 1.20                          | 1.18 – 1.22 | < 0.001        | 1.50                                         | 1.45 – 1.56 | < 0.001        |
| Cardiac Arrhythmias                          |   | 1.30                                           | 1.26 – 1.34 | < 0.001        | 1.29                          | 1.26 – 1.32 | < 0.001        | 1.38                                         | 1.27 – 1.49 | < 0.001        |
| Valvular Heart Disease                       |   | 1.18                                           | 1.15 – 1.20 | < 0.001        | 1.15                          | 1.13 – 1.17 | < 0.001        | 1.22                                         | 1.16 – 1.29 | < 0.001        |
| Diabetes Mellitus                            |   | 1.24                                           | 1.22 – 1.26 | < 0.001        | 1.18                          | 1.17 – 1.19 | < 0.001        | 1.24                                         | 1.19 – 1.26 | < 0.001        |
| Diabetes Mellitus with Chronic Complications |   | 1.46                                           | 1.43 – 1.49 | < 0.001        | 1.38                          | 1.35 – 1.41 | < 0.001        | 1.50                                         | 1.42 – 1.58 | < 0.001        |
| Hypertension                                 |   | 1.13                                           | 1.11 – 1.15 | < 0.001        | 1.12                          | 1.11 – 1.14 | < 0.001        | 0.94                                         | 0.92 – 0.97 | < 0.001        |
| Hypertension with Chronic Complications      |   | 1.20                                           | 1.17 – 1.23 | < 0.001        | 1.16                          | 1.13 – 1.12 | < 0.001        | 1.27                                         | 1.21 – 1.35 | < 0.001        |

ESRD = End stage renal disease, HR = Hazard ratio, CKD = Chronic kidney disease. Serious Mental Illness (SMI) was defined as a history of, or current co-occurring schizophrenic, bipolar, dysthymic or major depressive disorders during index hospitalization.
